# Supplementary material for: Predicting Diabetes: Clinical, Biological, and Genetic Approaches
Source: Oxford University Press journal article supplement (doi:10.2337/dc08-0368), 2008-08-09
Supplement: dc080368-sup-online_table_for_online_appendix.doc [file dc080368-sup-online_table_for_online_appendix.doc]

On line Table

**Table A**—Polymorphisms related with incident diabetes. The D.E.S.I.R. Study

|  | Men | | | Women | | | *p* for variable | *p* var*sexe |
| --- | --- | --- | --- | --- | --- | --- | --- | --- |
|  | Diabetes | No diabetes | *p** | Diabetes | No diabetes | *p** |
| GCK (Glucokinase) -30A | n=135 | n=1617 |  | n=61 | n=1782 |  |  |  |
| AA | 7 (5%) | 49 (3%) | 0.2 | 4 (7%) | 61 (3%) | 0.4 | 0.1† | 0.9 |
| AG | 43 (32%) | 458 (28%) | 18 (29%) | 535 (30%) |
| GG | 85 (63%) | 1110 (69%) | 39 (64%) | 1186 (67%) |
| Additive model |  |  | 0.1 |  |  | 0.4 | 0.07† | 0.8 |
|  |  |  |  |  |  |  |  |  |
| IL6 (Interleukine 6) -174 G/C | n=139 | n=1674 |  | n=62 | n=1837 |  |  |  |
| CC | 16 (12%) | 280 (17%) | 0.2 | 6 (10%) | 292 (16%) | 0.3 | 0.08† | 0.9 |
| CG | 66 (47%) | 784 (47%) | 28 (45%) | 862 (47%) |
| GG | 57 (41%) | 610 (36%) | 28 (45%) | 683 (37%) |
| Additive model |  |  | 0.1 |  |  | 0.1 | 0.03† | 0.7 |
|  |  |  |  |  |  |  |  |  |
| KCNJ11(Kir6.2)-E23K | n=129 | n=1599 |  | n=61 | n=1734 |  |  |  |
| CC | 43 (33%) | 589 (37%) | 0.2 | 18 (30%) | 660 (38%) | 0.4 | 0.1† | 0.7 |
| CT | 59 (46%) | 766 (48%) | 32 (52%) | 825 (48%) |
| TT | 27 (21%) | 244 (15%) | 11 (18%) | 249 (14%) |
| Additive model |  |  | 0.1 |  |  | 0.2 | 0.05† | 0.8 |
|  |  |  |  |  |  |  |  |  |
| TCF7L2 rs7903146 | n=128 | n=1548 |  | n=58 | n=1700 |  |  |  |
| CC | 51 (40%) | 749 (48%) | 0.2 | 25 (43%) | 859 (51%) | 0.1 | 0.04† | 0.6 |
| CT | 62 (48%) | 659 (43%) | 24 (41%) | 702 (41%) |
| TT | 15 (12%) | 140 (9%) | 9 (16%) | 139 (8%) |
| Additive model |  |  | 0.06 |  |  | 0.08 | 0.01† | 0.7 |

*Chi square *p* for genotypes or *p* from a linear additive equation in linear regression

† *P*-value for variable in logistic model with only variable and sex, as interaction not significant
